# Supplementary material for: Screw fixation of ACPHT acetabular fractures offers sufficient biomechanical stability when compared to standard buttress plate fixation
Source: PubMed Central journal article supplement (PMC6346571; doi:10.1186/s12891-019-2422-6), 2019-01-24
Supplement: 12891_2019_2422_MOESM1_ESM.pdf [file 12891_2019_2422_MOESM1_ESM.pdf]

| SpecimenNo | Group | Group_coded | Test_Date                           | cycles_completed | cycles175 | cycles350 | cycles700 |     |
|------------|-------|-------------|-------------------------------------|------------------|-----------|-----------|-----------|-----|
| Plate1     | PLATE | 1           | 24.02.2018, 14.43                   | 2050             |           | 500       | 500       | 500 |
| Plate2     | PLATE | 1           | 24.02.2018, 18.54/28.02.2018, 9.46  | 2675             |           | 500       | 500       | 500 |
| Plate3     | PLATE | 1           | 26.01.2018, 10.00/28.01.2018, 10.01 | 2557             |           | 500       | 500       | 500 |
| Plate4     | PLATE | 1           | 27.02.2018, 14.42                   | 2020             |           | 500       | 500       | 500 |
| Screw1     | SCREW | 2           | 24.02.2018, 8.52                    | 3200             |           | 500       | 500       | 500 |
| Screw2     | SCREW | 2           | 24.02.2018, 15.26/28.02.2018, 9.00  | 3101             |           | 500       | 500       | 500 |
| Screw3     | SCREW | 2           | 24.02.2018, 20.05/28.02.2018, 9.07  | 3200             |           | 500       | 500       | 500 |
| Screw4     | SCREW | 2           | 27.02.2018, 9.57/28.02.2018, 9.27   | 3200             |           | 500       | 500       | 500 |

| cycles1050 | cycles1400 | cycles1750 | cycles2100 | cycles2450 | N_cycles | Gap175  | Gap175_1 | Gap175_2 | Gap175_3 |      |
|------------|------------|------------|------------|------------|----------|---------|----------|----------|----------|------|
| 500        | 50         | 0          | 0          | 0          | 0        | 1207500 | 1,65333  | 1,63     | 1,66     | 1,67 |
| 500        | 500        | 175        | 0          | 0          | 0        | 2143750 | 2,07667  | 2,1      | 2,06     | 2,07 |
| 500        | 500        | 57         | 0          | 0          | 0        | 1937250 | 1,26667  | 1,24     | 1,26     | 1,3  |
| 500        | 20         | 0          | 0          | 0          | 0        | 1165500 | 0,9      | 0,9      | 0,86     | 0,94 |
| 500        | 500        | 500        | 100        | 100        | 100      | 3167500 | 1,62     | 1,68     | 1,6      | 1,58 |
| 500        | 500        | 500        | 100        | 1          | 1        | 2924950 | 1,09667  | 1,06     | 1,1      | 1,13 |
| 500        | 500        | 500        | 100        | 100        | 100      | 3167500 | 0,93667  | 0,96     | 0,93     | 0,92 |
| 500        | 500        | 500        | 100        | 100        | 100      | 3167500 | 0,18667  | 0,18     | 0,18     | 0,2  |

| GapChange350 | Gap350      | Gap350_1 | Gap350_2 | Gap350_3 | GapChange700 | Gap700    | Gap700_1 | Gap700_2 | Gap700_3 |
|--------------|-------------|----------|----------|----------|--------------|-----------|----------|----------|----------|
| 0,28         | 1,933333333 | 1,94     | 1,91     | 1,95     | 0,38         | 2,0333333 | 2        | 2,04     | 2,06     |
| 0,006666667  | 2,083333333 | 2,08     | 2,08     | 2,09     | 0,013333333  | 2,09      | 2,09     | 2,09     | 2,09     |
| -0,033333333 | 1,233333333 | 1,22     | 1,23     | 1,25     | -0,086666667 | 1,18      | 1,2      | 1,16     | 1,18     |
| 0,083333333  | 0,983333333 | 0,99     | 0,94     | 1,02     | -0,06        | 0,84      | 0,84     | 0,86     | 0,82     |
| -0,023333333 | 1,596666667 | 1,59     | 1,6      | 1,6      | -0,05        | 1,57      | 1,58     | 1,57     | 1,56     |
| 0,06         | 1,156666667 | 1,17     | 1,18     | 1,12     | 0,116666667  | 1,2133333 | 1,17     | 1,24     | 1,23     |
| 0,14         | 1,076666667 | 1,1      | 1,07     | 1,06     | 0,196666667  | 1,1333333 | 1,18     | 1,11     | 1,11     |
| 0,036666667  | 0,223333333 | 0,26     | 0,2      | 0,21     | 0,093333333  | 0,28      | 0,24     | 0,29     | 0,31     |

| GapChange1050 | Gap1050 | Gap1050_1 | Gap1050_2 | Gap1050_3 | GapChange1400 | Gap1400     | Gap1400_1 | Gap1400_2 | Gap1400_3 |
|---------------|---------|-----------|-----------|-----------|---------------|-------------|-----------|-----------|-----------|
| 0,32          | 1,97333 | 1,95      | 1,97      | 2         | 0,58          | 2,233333333 | 2,2       | 2,29      | 2,21      |
| 0,17          | 2,24667 | 2,24      | 2,24      | 2,26      | 0,176666667   | 2,253333333 | 2,25      | 2,23      | 2,28      |
| -0,083333333  | 1,18333 | 1,17      | 1,19      | 1,19      | -0,053333333  | 1,213333333 | 1,22      | 1,2       | 1,22      |
| 0,016666667   | 0,91667 | 0,94      | 0,91      | 0,9       | 0,006666667   | 0,906666667 | 0,91      | 0,9       | 0,91      |
| 0,48          | 2,1     | 2,18      | 2,12      | 2         | 0,736666667   | 2,356666667 | 2,37      | 2,34      | 2,36      |
| 0,21          | 1,30667 | 1,3       | 1,34      | 1,28      | 0,196666667   | 1,293333333 | 1,3       | 1,28      | 1,3       |
| 0,266666667   | 1,20333 | 1,21      | 1,23      | 1,17      | 0,703333333   | 1,64        | 1,68      | 1,61      | 1,63      |
| 0,136666667   | 0,32333 | 0,3       | 0,31      | 0,36      | 0,433333333   | 0,62        | 0,5       | 0,68      | 0,68      |

| GapChange1750 | Gap1750      | Gap1750_1 | Gap1750_2 | Gap1750_3 | Gap2100_1 | Gap2100_2 | Gap2100_3 | FemurIn175  |
|---------------|--------------|-----------|-----------|-----------|-----------|-----------|-----------|-------------|
| 0,6233333333  | 2,276666667  | 2,28      | 2,29      | 2,26      | 3,91      | 3,25      | 3,5       | 5,18        |
| 0,216666667   | 2,2933333333 | 2,29      | 2,29      | 2,3       | 2,99      | 2,96      | 3,02      | 6,61        |
| -0,03         | 1,236666667  | 1,24      | 1,23      | 1,24      | 1,23      | 1,4       | 1,39      | 6,463333333 |
| 0,786666667   | 1,686666667  | 1,73      | 1,65      | 1,68      | 2,15      | 2,13      | 2,14      | 7,153333333 |
| 1,0233333333  | 2,6433333333 | 2,65      | 2,65      | 2,63      | 3,67      | 3,77      | 3,65      | 5,286666667 |
| 0,366666667   | 1,4633333333 | 1,45      | 1,46      | 1,48      | 1,99      | 1,73      | 1,86      | 5,41        |
| 2,9233333333  | 3,86         | 3,61      | 4         | 3,97      | 4,16      | 4,1       | 4,16      | 5,54        |
| 0,49          | 0,676666667  | 0,67      | 0,7       | 0,66      | 1,5       | 1,47      | 1,44      | 4,203333333 |

| FemurIn175_1 | FemurIn175_2 | FemurIn175_3 | FemurChange35 | FemurIn350  | FemurIn350_1 | FemurIn350_2 | FemurIn350_3 |
|--------------|--------------|--------------|---------------|-------------|--------------|--------------|--------------|
| 5,18         | 5,13         | 5,23         | 0,743333333   | 4,436666667 | 4,42         | 4,47         | 4,42         |
| 6,59         | 6,62         | 6,62         | 0,31          | 6,3         | 6,37         | 6,27         | 6,26         |
| 6,43         | 6,49         | 6,47         | 0,113333333   | 6,35        | 6,38         | 6,33         | 6,34         |
| 7,12         | 7,18         | 7,16         | 0,026666667   | 7,126666667 | 7,08         | 7,16         | 7,14         |
| 5,29         | 5,3          | 5,27         | 0,023333333   | 5,263333333 | 5,3          | 5,25         | 5,24         |
| 5,41         | 5,4          | 5,42         | -0,496666667  | 5,906666667 | 5,94         | 5,91         | 5,87         |
| 5,53         | 5,56         | 5,53         | 0,18          | 5,36        | 5,35         | 5,36         | 5,37         |
| 4,25         | 4,16         | 4,2          | -0,046666667  | 4,25        | 4,27         | 4,26         | 4,22         |

| FemurChange700 | FemurIn700  | FemurIn700_1 | FemurIn700_2 | FemurIn700_3 | FemurChange1050 | FemurIn1050 | FemurIn1050_1 |
|----------------|-------------|--------------|--------------|--------------|-----------------|-------------|---------------|
| 0,743333333    | 4,436666667 | 4,5          | 4,34         | 4,47         | 0,963333333     | 4,216666667 | 4,22          |
| 0,243333333    | 6,366666667 | 6,4          | 6,39         | 6,31         | 0,12            | 6,49        | 6,52          |
| 0,183333333    | 6,28        | 6,3          | 6,27         | 6,27         | 0,026666667     | 6,436666667 | 6,4           |
| 0,113333333    | 7,04        | 7,06         | 7,02         | 7,04         | 0,01            | 7,143333333 | 7,12          |
| 0,303333333    | 4,983333333 | 4,99         | 4,97         | 4,99         | 0,643333333     | 4,643333333 | 4,66          |
| -0,393333333   | 5,803333333 | 5,78         | 5,87         | 5,76         | -0,336666667    | 5,746666667 | 5,7           |
| 0,066666667    | 5,473333333 | 5,5          | 5,48         | 5,44         | 0,083333333     | 5,456666667 | 5,46          |
| -0,193333333   | 4,396666667 | 4,4          | 4,4          | 4,39         | 0,006666667     | 4,196666667 | 4,2           |

| FemurIn1050_2 | FemurIn1050_3 | FemurChange1 | FemurIn1400 | FemurIn1400_1 | FemurIn1400_2 | FemurIn1400_3 | FemurChange1750 | FemurIn1750 |
|---------------|---------------|--------------|-------------|---------------|---------------|---------------|-----------------|-------------|
| 4,18          | 4,25          | 0,96         | 4,22        | 4,23          | 4,2           | 4,23          | 0,92            | 4,26        |
| 6,51          | 6,44          | -0,02666667  | 6,63666667  | 6,61          | 6,66          | 6,64          | 0,54            | 6,07        |
| 6,47          | 6,44          | 0,023333333  | 6,44        | 6,44          | 6,46          | 6,42          | 0,226666667     | 6,236666667 |
| 7,1           | 7,21          | -0,04        | 7,193333333 | 7,21          | 7,17          | 7,2           | 0,193333333     | 6,96        |
| 4,64          | 4,63          | 0,603333333  | 4,683333333 | 4,69          | 4,69          | 4,67          | 0,573333333     | 4,713333333 |
| 5,76          | 5,78          | -0,26666667  | 5,67666667  | 5,66          | 5,73          | 5,64          | -0,21           | 5,62        |
| 5,5           | 5,41          | 0,066666667  | 5,473333333 | 5,45          | 5,49          | 5,48          | -0,52           | 6,06        |
| 4,22          | 4,17          | -0,09666667  | 4,3         | 4,3           | 4,33          | 4,27          | -0,033333333    | 4,236666667 |



| FemurIn1750_1 | FemurIn1750_2 | FemurIn1750_3 | FemurIn2100_1 | FemurIn2100_2 | FemurIn2100_3 | RimAngle175 | RimAngle175_1 | RimAngle175_2 |
|---------------|---------------|---------------|---------------|---------------|---------------|-------------|---------------|---------------|
| 4,27          | 4,26          | 4,25          | 5,12          | 4,99          | 4,86          | 170,93      | 171,69        | 170,17        |
| 6,09          | 6,12          | 6             | 5,88          | 5,83          | 5,82          | 169,06      | 169,51        | 168,2         |
| 6,22          | 6,27          | 6,22          | 6,83          | 6,86          | 6,83          | 175,263333  | 175,41        | 175,48        |
| 7             | 6,95          | 6,93          | 7             | 6,98          | 6,98          | 165,49      | 166,22        | 165,09        |
| 4,7           | 4,73          | 4,71          | 5,45          | 5,24          | 5,28          | 171,3       | 171,12        | 171,53        |
| 5,59          | 5,64          | 5,63          | 6,8           | 6,8           | 6,85          | 173,876667  | 171,71        | 176,84        |
| 6,02          | 6,11          | 6,05          | 5,7           | 5,72          | 5,7           | 171,606667  | 172,32        | 171,06        |
| 4,26          | 4,24          | 4,21          | 4,64          | 4,67          | 4,69          | 178,553333  | 178,7         | 179,29        |

| RimAngle175_3 | RimChange350 | RimAngle350 | RimAngle350_1 | RimAngle350_2 | RimAngle350_3 | RimChange700 | RimAngle700 |
|---------------|--------------|-------------|---------------|---------------|---------------|--------------|-------------|
| 170,93        | 0,153333333  | 170,7766667 | 170,78        | 170,09        | 171,46        | -0,32        | 171,25      |
| 169,47        | 3,83         | 165,23      | 164,17        | 165,98        | 165,54        | 8,533333333  | 160,5266667 |
| 174,9         | -0,73        | 175,9933333 | 175,75        | 175,72        | 176,51        | 1,596666667  | 173,6666667 |
| 165,16        | -0,393333333 | 165,8833333 | 166,54        | 165,16        | 165,95        | -1,026666667 | 166,5166667 |
| 171,25        | -0,743333333 | 172,0433333 | 171,19        | 172,07        | 172,87        | 1,006666667  | 170,2933333 |
| 173,08        | 1,91         | 171,9666667 | 173,58        | 171,63        | 170,69        | 2,213333333  | 171,6633333 |
| 171,44        | 0,123333333  | 171,4833333 | 171,94        | 171,28        | 171,23        | 1,676666667  | 169,93      |
| 177,67        | -0,096666667 | 178,65      | 178,6         | 178,92        | 178,43        | 1,84         | 176,7133333 |

| RimAngle700_1 | RimAngle700_2 | RimAngle700_3 | RimChange1050 | RimAngle1050 | RimAngle1050_1 | RimAngle1050_2 | RimAngle1050_3 |
|---------------|---------------|---------------|---------------|--------------|----------------|----------------|----------------|
| 171,42        | 170,89        | 171,44        | -1,22         | 172,15       | 172,72         | 172,48         | 171,25         |
| 160,9         | 159,79        | 160,89        | 7,94          | 161,12       | 161,88         | 161,47         | 160,01         |
| 174,09        | 173,47        | 173,44        | 0,426666667   | 174,836667   | 174,44         | 175,65         | 174,42         |
| 168,44        | 165,95        | 165,16        | 0,77          | 164,72       | 165,69         | 164,32         | 164,15         |
| 171,29        | 169,94        | 169,65        | 0,346666667   | 170,953333   | 171,29         | 170,75         | 170,82         |
| 171,44        | 171,37        | 172,18        | 2,13          | 171,746667   | 169,82         | 173,68         | 171,74         |
| 168,28        | 170,46        | 171,05        | 1,426666667   | 170,18       | 171,99         | 168,79         | 169,76         |
| 177,21        | 176,48        | 176,45        | 2,193333333   | 176,36       | 176,42         | 176,27         | 176,39         |

| RimChange1400 | RimAngle1400 | RimAngle1400_1 | RimAngle1400_2 | RimAngle1400_3 | RimChange1750 | RimAngle1750 | RimAngle1750_1 |
|---------------|--------------|----------------|----------------|----------------|---------------|--------------|----------------|
| -0,876666667  | 171,806667   | 171,43         | 171,61         | 172,38         | -0,686666667  | 171,6166667  | 171,67         |
| 3,833333333   | 165,226667   | 165,17         | 165,23         | 165,28         | 5,23          | 163,83       | 163,98         |
| 1,006666667   | 174,256667   | 173,6          | 174,54         | 174,63         | 4,763333333   | 170,5        | 171,49         |
| -0,27         | 165,76       | 164,03         | 164,7          | 168,55         | 3,163333333   | 162,3266667  | 163,44         |
| 2,04          | 169,26       | 168,89         | 170,85         | 168,04         | 3,15          | 168,15       | 167,76         |
| 3,14          | 170,736667   | 170,19         | 171,35         | 170,67         | 3,603333333   | 170,2733333  | 171,56         |
| 1,846666667   | 169,76       | 171,12         | 168,37         | 169,79         | 1,92          | 169,6866667  | 171,09         |
| 5,59          | 172,963333   | 172,23         | 173,19         | 173,47         | 7,12          | 171,4333333  | 171,37         |

| RimAngle1750_2 | RimAngle1750_3 | RimAngle2100_1 | RimAngle2100_2 | RimAngle2100 |
|----------------|----------------|----------------|----------------|--------------|
| 171,05         | 172,13         | 170,58         | 169,74         | 171,01       |
| 163,77         | 163,74         | 164,23         | 163,67         | 163,92       |
| 169,28         | 170,73         | 169,09         | 171,41         | 169,91       |
| 160,92         | 162,62         | 155,67         | 160,14         | 156,75       |
| 168,93         | 167,76         | 169,71         | 169,6          | 170,56       |
| 169,08         | 170,18         | 168,31         | 169,76         | 168,64       |
| 169,05         | 168,92         | 170,03         | 169,62         | 168,02       |
| 170,96         | 171,97         | 171,37         | 171,56         | 171,26       |
